# Supplementary material
Source: Frontiers journal article supplement (https://www.frontiersin.org/articles/303276)
Supplement: Image_8.PDF [file Image_8.PDF]

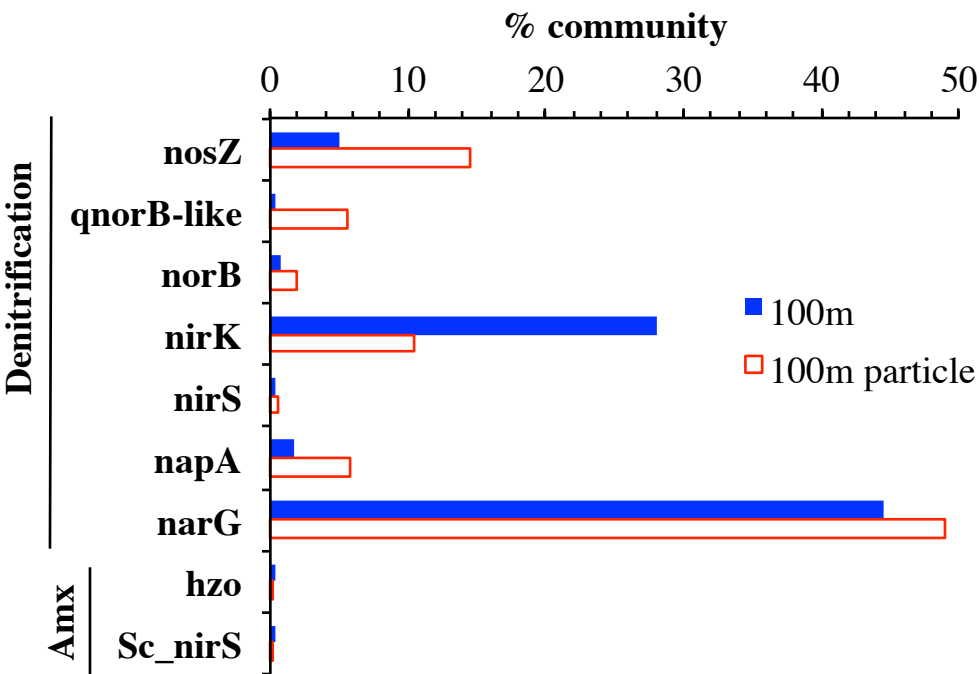

Figure S8. A comparison of denitrification and anammox (Amx) genes from bulk water from 100m (St 136) and >30  $\mu$ m particle from 100m (St BB2). *Sc-nirS* indicates anammox (*Scalindua*) *nirS*. % Community is calculated in comparison to the single copy core gene RNA polymerase (*rpoB*).
