# Supplementary material
Source: Frontiers journal article supplement (https://www.frontiersin.org/articles/303276)
Supplement: Image_13.PDF [file Image_13.PDF]

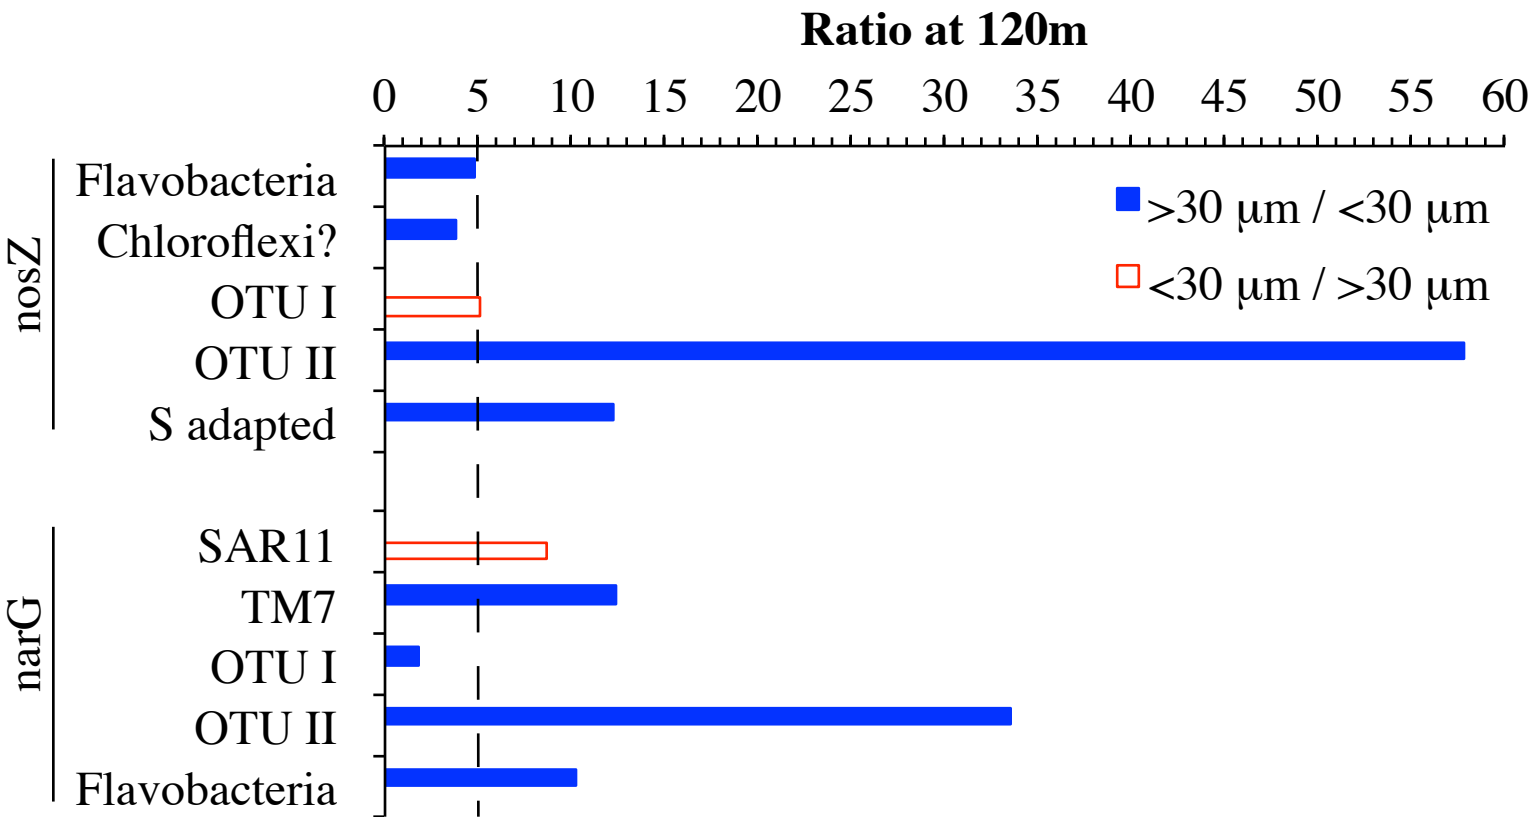

Figure S13. *nosZ* and *narG* phylotypes on particle and prefiltered samples from 120m. If the ratio of  $>30\ \mu\text{m} / <30\ \mu\text{m}$  is  $>5$ , then the phylotype is considered particle-attached, and if the ratio of  $<30\ \mu\text{m} / >30\ \mu\text{m}$  is  $>5$ , then the phylotype is considered free-living (Fuchsman et al., 2011).
